# Supplementary material
Source: Royal Society of Chemistry journal article supplement (doi:10.1039/d6ta01064d)
Supplement: d6ta01064d1.pdf [file d6ta01064d1.pdf]

# **Decoupling Anodic Passivation from Electrodeposition: Synergistic Crystallographic and Electronic Modulation for Energy-Efficient EMD Electrowinning**

Luli Feng <sup>a</sup>, Fengwei Xie <sup>a</sup>, Ziyi Xu <sup>a</sup>, Renzi Yuan <sup>a</sup>, Linping Yu <sup>b,\*</sup>, Weijun Shen <sup>c</sup>, Yuehui He <sup>a,\*</sup>

<sup>a</sup> State Key Laboratory of Powder Metallurgy, Powder Metallurgy Research Institute, Central South University, Changsha 410083, P. R. China.

<sup>b</sup> Hunan Provincial Key Laboratory of Materials Protection for Electric Power and Transportation, Changsha University of Science and Technology, Changsha 410114, P. R. China.

<sup>c</sup> College of Mechanical Engineering, Hunan Institute of Engineering, Xiangtan 411104, China

\*Corresponding author.

E-mail: [linping\\_yu@csust.edu.cn](mailto:linping_yu@csust.edu.cn) (L.P. Yu); E-mail: [yuehui@csu.edu.cn](mailto:yuehui@csu.edu.cn) (Y.H. He)

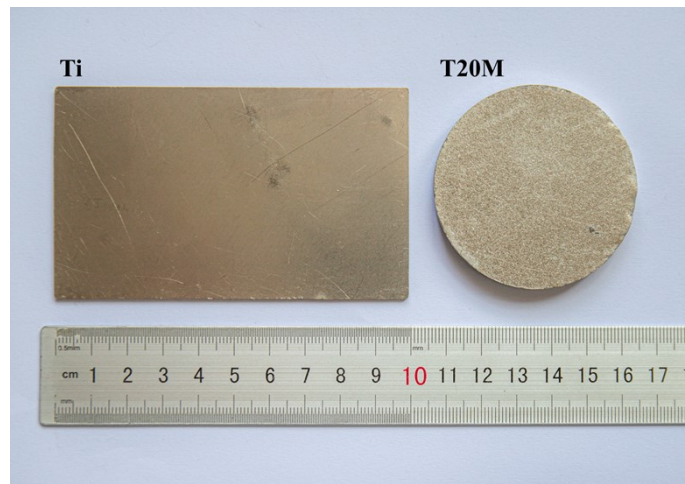

Fig. S1 Macroscopic optical photographs of the pristine pure Ti plate and the as-fabricated T20M bulk alloy.

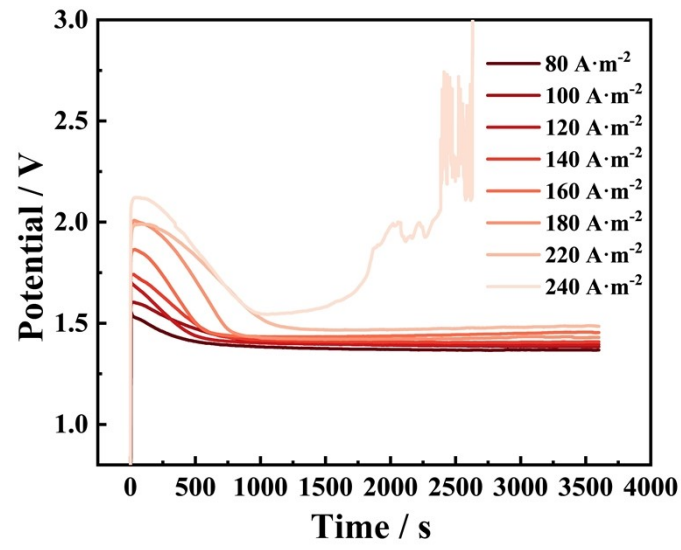

Fig. S2 Chronopotentiometry profiles of the T20Mq anode at current densities ranging from 80 to 240 A·m<sup>-2</sup>

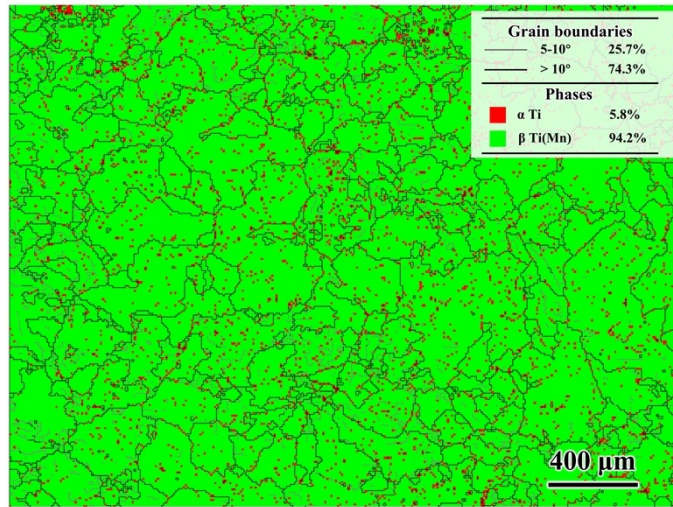

Fig. S3 The phase image corresponding to the EBSD image of T20Mq in Fig.3.

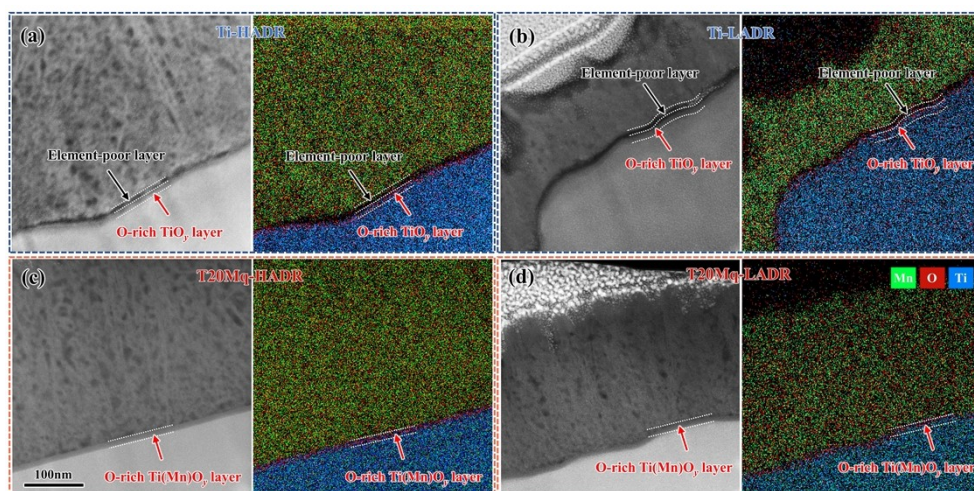

Fig. S4 STEM images and corresponding EDS elemental maps of the EMD/anode interfaces within the HADR and LADR zones. (a, b) Ti anode. (c, d) T20Mq anode.

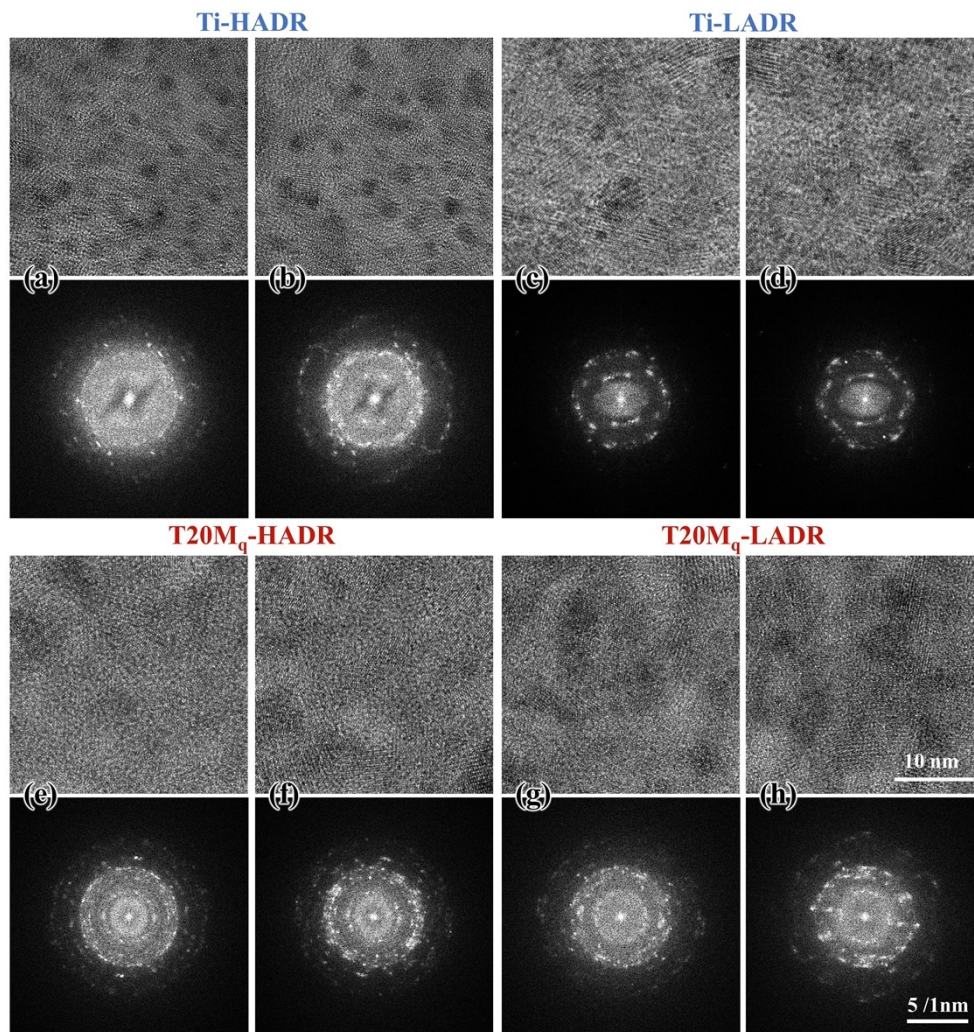

Fig. S5 HRTEM images and corresponding FFT patterns of the EMD deposit at distances of 20 nm and 80 nm from the interface. (a, b) Ti anode (HADR). (c, d) Ti anode (LADR). (e, f) T20M<sub>q</sub> anode (HADR). (g, h) T20M<sub>q</sub> anode (LADR).

Table S1 The corrosion potential ( $E_{\text{corr}}$ ) and corrosion current ( $I_{\text{corr}}$ ) corresponding to Fig. 1f

| Samples | $E_{\text{corr}}$ (V) | $I_{\text{corr}}$ ( $10^{-4}$ A·cm <sup>-2</sup> ) |
|---------|-----------------------|----------------------------------------------------|
| Ti      | -0.650                | 8.741                                              |
| T20Ms   | -0.731                | 22.91                                              |
| T20Mq   | -0.701                | 32.08                                              |

Table S2 Electrochemical impedance parameters fitted for the Ti and T20M anode

| Sample | $R_s$<br>( $\Omega$ ) | $Y_{0, \text{film}}$<br>( $10^{-4} \text{ S}\cdot\text{s}^n$ ) | $n_{\text{film}}$ | $R_{\text{film}}$<br>( $\Omega$ ) | $Y_{0, \text{dl}}$<br>( $10^{-2} \text{ S}\cdot\text{s}^n$ ) | $n_{\text{dl}}$ | $R_{\text{ct}}$<br>( $\Omega$ ) | $\chi^2$<br>( $10^{-4}$ ) | Circuit Code |
|--------|-----------------------|----------------------------------------------------------------|-------------------|-----------------------------------|--------------------------------------------------------------|-----------------|---------------------------------|---------------------------|--------------|
| Ti     | 1.52                  | 2.32                                                           | 0.89              | 39.04                             | 3.06                                                         | 0.83            | 46.79                           | 2.24                      | R(QR(QR))    |
| T20Ms  | 1.08                  | 10.5                                                           | 0.81              | 10.31                             | 5.69                                                         | 0.80            | 16.22                           | 36.7                      | R(QR(QR))    |
| T20Mq  | 1.00                  | 5.92                                                           | 0.86              | 10.48                             | 5.83                                                         | 0.90            | 14.14                           | 8.86                      | R(QR(QR))    |

The equivalent circuit used for fitting is  $R_s(Q_{\text{film}}R_{\text{film}})(Q_{\text{dl}}R_{\text{ct}})$ , where  $(Q_{\text{film}}R_{\text{film}})$  represents the response of the surface oxide film, and  $(Q_{\text{dl}}R_{\text{ct}})$  corresponds to the double-layer capacitance and charge transfer resistance at the electrode/electrolyte interface.

All impedance parameters are normalized to the geometric area of the electrode ( $1 \text{ cm}^2$ ).

Table S3. Electrochemical impedance parameters fitted for the Ti anode during electrodeposition.

| Time<br>(s) | $R_s$<br>( $\Omega$ ) | $Y_{0,int}$<br>( $10^{-5} \text{ S} \cdot \text{s}^n$ ) | $n_{int}$ | $R_{int}$<br>( $\Omega$ ) | $\chi^2$<br>( $10^{-4}$ ) | Circuit Code |
|-------------|-----------------------|---------------------------------------------------------|-----------|---------------------------|---------------------------|--------------|
| 120         | 1.32                  | 2.45                                                    | 0.957     | 420.1                     | 2.05                      | R(QR)        |
| 240         | 1.35                  | 2.46                                                    | 0.956     | 270.9                     | 2.86                      | R(QR)        |
| 480         | 1.29                  | 3.94                                                    | 0.908     | 175.9                     | 5.79                      | R(QR)        |
| 960         | 1.34                  | 3.70                                                    | 0.912     | 161.3                     | 4.94                      | R(QR)        |
| 1920        | 1.39                  | 3.41                                                    | 0.917     | 172.7                     | 3.96                      | R(QR)        |
| 3840        | 1.53                  | 3.35                                                    | 0.913     | 202.0                     | 5.78                      | R(QR)        |
| 10800       | 1.95                  | 2.97                                                    | 0.909     | 330.6                     | 13.6                      | R(QR)        |
| 36000       | 5.67                  | 1.66                                                    | 0.936     | 387.6                     | 8.88                      | R(QR)        |
| stripped    | 2.20                  | 1.65                                                    | 0.941     | 347.7                     | 15.9                      | R(QR)        |

All impedance parameters are normalized to the geometric area of the electrode ( $1 \text{ cm}^2$ ).

Circuit Codes: R(QR) represents the model  $R_s(Q_{int}R_{int})$ , where  $R_{int}$  reflects the total interfacial resistance dominated by the passive film.

Table S4. Electrochemical impedance parameters fitted for the T20Mq anode during electrodeposition.

| Time<br>(s) | $R_s$<br>( $\Omega$ ) | $Y_{0,1}$<br>( $10^{-5} \text{ S} \cdot \text{s}^n$ ) | $n_1$ | $R_1$<br>( $\Omega$ ) | $Y_{0,2}$<br>( $10^{-3} \text{ S} \cdot \text{s}^n$ ) | $n_2$ | $R_2$<br>( $\Omega$ ) | $W$<br>( $\Omega \cdot \text{s}^{-0.5}$ ) | $\chi^2$<br>( $10^{-4}$ ) | Circuit<br>Code |
|-------------|-----------------------|-------------------------------------------------------|-------|-----------------------|-------------------------------------------------------|-------|-----------------------|-------------------------------------------|---------------------------|-----------------|
| 120         | 1.17                  | 4.01                                                  | 0.87  | -                     | -                                                     | -     | 40.58                 | -                                         | 54.6                      | R(QR)           |
| 240         | 1.13                  | 10.4                                                  | 0.79  | -                     | -                                                     | -     | 27.45                 | -                                         | 32.3                      | R(QR)           |
| 480         | 1.20                  | 45.2                                                  | 0.65  | -                     | -                                                     | -     | 15.19                 | -                                         | 16.2                      | R(QR)           |
| 960         | 1.59                  | 4.82                                                  | 0.90  | 2.01                  | 1.06                                                  | 0.74  | 4.15                  | -                                         | 0.54                      | R(QR)(QR)       |
| 1920        | 1.70                  | 2.28                                                  | 1.00  | 1.19                  | 1.82                                                  | 0.65  | 4.64                  | -                                         | 6.84                      | R(QR)(QR)       |
| 3840        | 1.77                  | 2.19                                                  | 1.00  | 1.25                  | 6.50                                                  | 0.51  | 4.90                  | -                                         | 6.08                      | R(QR)(QR)       |
| 10800       | 2.33                  | 3.20                                                  | 0.91  | -                     | -                                                     | -     | 2.10                  | 0.193                                     | 8.77                      | R(Q(RW))        |
| 36000       | 3.73                  | 1.41                                                  | 1.00  | -                     | -                                                     | -     | 2.41                  | 0.073                                     | 13.5                      | R(Q(RW))        |
| Stripped    | 1.40                  | 3.27                                                  | 0.93  | -                     | -                                                     | -     | 2.68                  | 0.764                                     | 0.35                      | R(Q(RW))        |

All impedance parameters are normalized to the geometric area of the electrode ( $1 \text{ cm}^2$ ).

"-" indicates that the parameter is not applicable in the equivalent circuit model.

Column Definitions: Subscripts '1' and '2' denote the high-frequency and low-frequency time constants, respectively.

$R_1$ : Resistance of the inner conductive film ( $R_{in}$ ).

$R_2$ : Primary charge transfer resistance ( $R_{ct}$ ).

$Y_{0,1} / Y_{0,2}$ : CPE magnitude for the inner interface ( $CPE_{in}$ ) and outer porous layer ( $CPE_{out}$ ), respectively.

Circuit Codes: R(QR) represents the model  $R_s(Q_{in}R_{int})$  for nucleation; R(QR)(QR) represents  $R_s(Q_{in}R_{in})(Q_{out}R_{ct})$  for bi-layer growth; R(Q(RW)) represents  $R_s(Q_{in}(R_{ct}W))$  for diffusion-controlled steady state.

Table S5 Calculated electrochemically active surface area (ECSA) and roughness factor ( $R_f$ ).

| Time<br>(s) | Ti                                       |                    |       | T20Mq                              |                    |        |
|-------------|------------------------------------------|--------------------|-------|------------------------------------|--------------------|--------|
|             | $Y_{0,int}$<br>( $10^{-5} S \cdot s^n$ ) | ECSA<br>( $cm^2$ ) | $R_f$ | $Y_0$<br>( $10^{-5} S \cdot s^n$ ) | ECSA<br>( $cm^2$ ) | $R_f$  |
| 120         | 2.45                                     | 0.61               | 0.61  | 4.01                               | 1.00               | 1.00   |
| 240         | 2.46                                     | 0.62               | 0.62  | 10.4                               | 2.60               | 2.60   |
| 480         | 3.94                                     | 0.98               | 0.98  | 45.2                               | 11.30              | 11.30  |
| 960         | 3.70                                     | 0.93               | 0.93  | 106                                | 26.50              | 26.50  |
| 1920        | 3.41                                     | 0.85               | 0.85  | 182                                | 45.50              | 45.50  |
| 3840        | 3.35                                     | 0.84               | 0.84  | 650                                | 162.50             | 162.50 |
| 10800       | 2.97                                     | 0.74               | 0.74  | -                                  | -                  | -      |

The electrochemically active surface area (ECSA) was calculated based on the double-layer capacitance ( $C_{dl}$ ) derived from EIS. The calculation follows the standard relationship:

$$R_f = \frac{C_{dl}}{c_s}$$

$$ECSA = R_f \cdot A_{geo}$$

Where:

$C_{dl}$  is the measured double-layer capacitance (approximated by the CPE magnitude  $Y_0$  in  $S \cdot s^n \cdot cm^{-2}$ , normalized to geometric area).

$c_s$  is the specific capacitance of a smooth standard surface, taken as  $40 \mu F \cdot cm^{-2}$ .

$R_f$  is the roughness factor, representing the ratio of real active area to geometric area.

$A_{geo}$  is the geometric surface area of the electrode. In this work,  $A_{geo} = 1.0 cm^2$ , thus the numerical value of ECSA ( $cm^2$ ) is identical to  $R_f$ .

For the T20Mq anode at steady state ( $>10800 s$ ), the ECSA calculation is not applicable because the low-frequency capacitive response of the porous layer is dominated by the diffusion process.
